# Supplementary material for: Green fabrication of antibacterial polymer/silver nanoparticle nanohybrids by dual-spinneret electrospinning
Source: Royal Society of Chemistry journal article supplement (doi:10.1039/c5ra03288a), 2015-01-01
Supplement: c5ra03288a1.pdf [file c5ra03288a1.pdf]

ESI

## Green fabrication of antibacterial polymer/silver nanoparticle nanohybrids by dual-spinneret electrospinning

Runze Wang,<sup>a,b</sup> Zheng Wang,<sup>a,b</sup> Song Lin,<sup>\* a,b</sup> Cheng Deng,<sup>b</sup> Fan Li,<sup>b</sup> Zhijian Chen<sup>\*,c</sup> and Hua He<sup>d</sup>

<sup>a</sup> National Bio-Protection Engineering Centre, Tianjin, People's Republic of China; Email: [lynch163@163.com](mailto:lynch163@163.com) (S. Lin)

<sup>b</sup> Institute of Medical Equipment, Academy of Military Medical Sciences, Tianjin, People's Republic of China.

<sup>c</sup> School of Chemical Engineering and Technology, Tianjin University, Tianjin, People's Republic of China. Email: [zjchen@tju.edu.cn](mailto:zjchen@tju.edu.cn) (Z. Chen)

<sup>d</sup> Department of Neurosurgery, Changzheng Hospital, Second Affiliated Hospital of Second Military Medical University, Shanghai, People's Republic of China

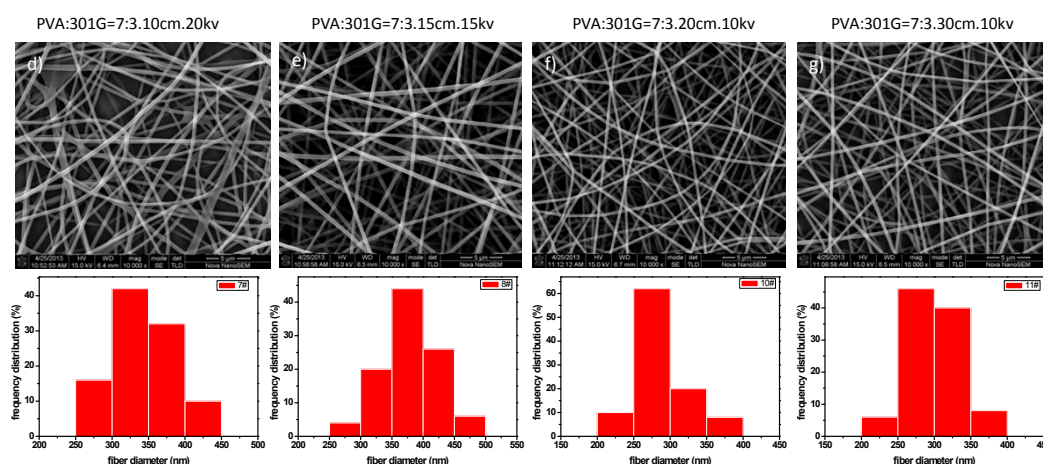

Figure S1. Typical SEM images of WPU/PVA (3:7) at different electrospun conditions by applying various positive voltages and tip-to-collector distances: d) 20 kV & 10cm; e) 15 kV & 15cm; f) 10 kV & 20 cm; g) 10 kV & 30 cm. The histogram on second row below each image represents the statistic frequency distribution of obtained nanofibres with different diameters (50 counts), respectively. Scale bar: 5  $\mu$ m

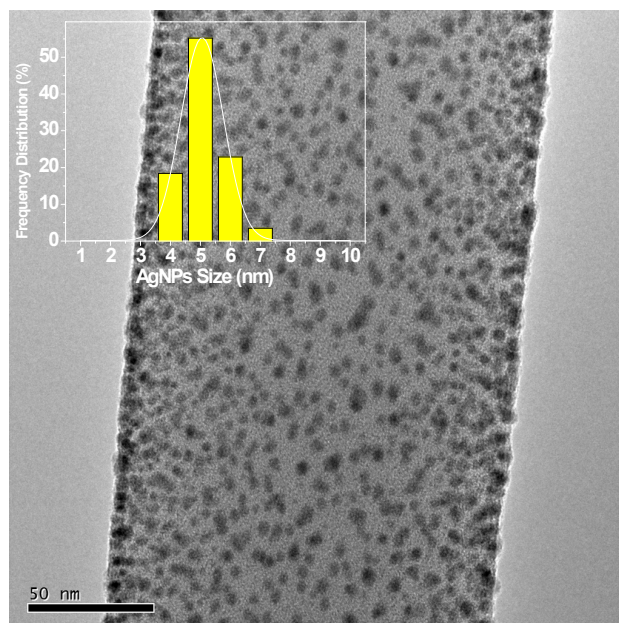

Figure S2. TEM images of the as-prepared PVA-Ag fiber in the W-P-Ag nanofiber mats, respectively. Inset: frequency distribution diagrams (200 counts) of AgNP size. Scale bar: 50 nm.

Figure S3. TEM images of the merged (a & b) and brached (c) PVA-Ag and WPU/PVA fiber in the W-P-Ag nanofiber mats
